## CORRECTION

# Correction: Shot and Patronin polarise microtubules to direct membrane traffic and biogenesis of microvilli in epithelia

Ichha Khanal, Ahmed Elbediwy, Maria del Carmen Diaz de la Loza, Georgina C. Fletcher and Barry J. Thompson

There was an error published in *J. Cell Sci.* **129**, 2651-2659.

In the abstract of this paper, there was a typographical error in the protein name CAMSAP3. The correct sentence should read:

Core apical-basal polarity determinants polarise the spectrin cytoskeleton to recruit the microtubule-binding proteins Patronin (CAMSAP1, CAMSAP2 and CAMSAP3 in humans) and Shortstop [Shot; MACF1 and BPAG1 (also known as DST) in humans] to the apical membrane domain.

The online version of the article has been corrected accordingly.

We apologise to the authors and readers for any confusion that this error might have caused.
